# Supplementary material for: The CYGNO Experiment
Source: MDPI journal article supplement (doi:10.3390/instruments6010006), 2022-01-21
Supplement: s1 [file s1]

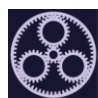

# Supplementary Materials

## Author Contributions

Table S1 Author Contributions.

| Author                             | Contributions                                                                                                      |
|------------------------------------|--------------------------------------------------------------------------------------------------------------------|
| Fernando Domingues Amaro           | Conceptualization, investigations, experimental and software methodologies, review and editing                     |
| Elisabetta Baracchini              | Conceptualization, investigations, experimental and software methodologies, project administration, Original draft |
| Luigi Benussi                      | Conceptualization, investigations, experimental and software methodologies                                         |
| Stefano Bianco                     | Conceptualization, investigations, experimental and software methodologies                                         |
| Cesidio Capoccia                   | Conceptualization, investigations, experimental and software methodologies                                         |
| Michele Caponero                   | Conceptualization, investigations, experimental and software methodologies                                         |
| Danilo Santos Cardoso              | Conceptualization, investigations, experimental and software methodologies                                         |
| Gianluca Cavoto                    | Conceptualization, investigations, experimental and software methodologies, review and editing                     |
| André Cortez                       | Conceptualization, investigations, experimental and software methodologies                                         |
| Igor Abritta Costa                 | Conceptualization, investigations, experimental and software methodologies                                         |
| Rita Joanna da Cruz Roque          | Conceptualization, investigations, experimental and software methodologies                                         |
| Emiliano Dané                      | Conceptualization, investigations, experimental and software methodologies                                         |
| Giorgio Dho                        | Conceptualization, investigations, experimental and software methodologies                                         |
| Flaminia Di Giambattista           | Conceptualization, investigations, experimental and software methodologies                                         |
| Emanuele Di Marco                  | Conceptualization, investigations, experimental and software methodologies, review and editing                     |
| Giovanni Grilli di Cortona         | Conceptualization, investigations, experimental and software methodologies, review and editing                     |
| Giulia D'Imperio                   | Conceptualization, investigations, experimental and software methodologies                                         |
| Francesco Iacoangeli               | Conceptualization, investigations, experimental and software methodologies                                         |
| Herman Pessoa Lima Júnior          | Conceptualization, investigations, experimental and software methodologies                                         |
| Guilherme Sebastiao Pinheiro Lopes | Conceptualization, investigations, experimental and software methodologies                                         |
| Amaro da Silva Lopes Júnior        | Conceptualization, investigations, experimental and software methodologies                                         |
| Giovanni Maccarrone                | Conceptualization, investigations, experimental and software methodologies                                         |

---

|                                     |                                                                                                                        |
|-------------------------------------|------------------------------------------------------------------------------------------------------------------------|
| Rui Daniel Passos Mano              | Conceptualization, investigations, experimental and software methodologies                                             |
| Michela Marafini                    | Conceptualization, investigations, experimental and software methodologies                                             |
| Robert Renz Marcelo Gregorio        | Conceptualization, investigations, experimental and software methodologies                                             |
| David José Gaspar Marques           | Conceptualization, investigations, experimental and software methodologies                                             |
| Giovanni Mazzitelli                 | Conceptualization, investigations, experimental and software methodologies, project administration, review and editing |
| Alasdair Gregor McLean              | Conceptualization, investigations, experimental and software methodologies                                             |
| Andrea Messina                      | Conceptualization, investigations, experimental and software methodologies, review and editing                         |
| Cristina Maria Bernardes Monteiro   | Conceptualization, investigations, experimental and software methodologies, review and editing                         |
| Rafael Antunes Nobrega              | Conceptualization, investigations, experimental and software methodologies                                             |
| Igor Fonseca Pains                  | Conceptualization, investigations, experimental and software methodologies                                             |
| Emiliano Paoletti                   | Conceptualization, investigations, experimental and software methodologies                                             |
| Luciano Passamonti                  | Conceptualization, investigations, experimental and software methodologies                                             |
| Sandro Pelosi                       | Conceptualization, investigations, experimental and software methodologies                                             |
| Fabrizio Petrucci                   | Conceptualization, investigations, experimental and software methodologies                                             |
| Stefano Piacentini                  | Conceptualization, investigations, experimental and software methodologies                                             |
| Davide Piccolo                      | Conceptualization, investigations, experimental and software methodologies                                             |
| Daniele Pierluigi                   | Conceptualization, investigations, experimental and software methodologies                                             |
| Davide Pinci                        | Conceptualization, investigations, experimental and software methodologies, project administration, Original draft     |
| Atul Prajapati                      | Conceptualization, investigations, experimental and software methodologies                                             |
| Francesco Renga                     | Conceptualization, investigations, experimental and software methodologies                                             |
| Filippo Rosatelli                   | Conceptualization, investigations, experimental and software methodologies                                             |
| Alessandro Russo                    | Conceptualization, investigations, experimental and software methodologies                                             |
| Joaquim Marques Ferreira dos Santos | Conceptualization, investigations, experimental and software methodologies                                             |
| Giovanna Saviano                    | Conceptualization, investigations, experimental and software methodologies                                             |
| Neil John Curwen Spooner            | Conceptualization, investigations, experimental and software methodologies, review and editing                         |
| Roberto Tesauero                    | Conceptualization, investigations, experimental and software methodologies                                             |

---

---

|                  |                                                                            |
|------------------|----------------------------------------------------------------------------|
| Sandro Tomassini | Conceptualization, investigations, experimental and software methodologies |
| Samuele Torelli  | Conceptualization, investigations, experimental and software methodologies |

---
